# Supplementary material for: Organic cation directed one-dimensional cuprous halide compounds: syntheses, crystal structures and photoluminescence properties
Source: Royal Society of Chemistry journal article supplement (doi:10.1039/c9dt01460h), 2019-01-01
Supplement: c9dt01460h1.pdf [file c9dt01460h1.pdf]

## Supporting Information

### **Organic Cations Directed One-Dimensional Cuprous Halide Compounds: Syntheses, Crystal Structures and Photoluminescent Properties**

Cheng-Yang Yue,<sup>[a,b]</sup> Na Lin,<sup>[a]</sup> Lu Gao,<sup>[a]</sup> Ying-Xue Jin,<sup>[a]</sup> Zhao-Yang Liu,<sup>[a]</sup> Yao-Yao Cao,<sup>[a]</sup> Sha-  
Sha Han,<sup>[a]</sup> Xi-Kai Lian,<sup>[a]</sup> Bing Hu,<sup>\*[b]</sup> Xiao-Wu Lei<sup>\*[a,b]</sup>

<sup>a</sup>Key Laboratory of Inorganic Chemistry in Universities of Shandong, Department of Chemistry and  
Chemical Engineering, Jining University, Qufu, Shandong, 273155, P. R. China

<sup>b</sup>State Key Laboratory of Structural Chemistry, Fujian Institute of Research on the Structure of  
Matter, Chinese Academy of Sciences, Fuzhou, Fujian, 350002, P. R. China

*\*Corresponding author:* Bing Hu, Xiao-Wu Lei

*E-mail address:* hubing@fjirsm.ac.cn; xwlei\_jnu@163.com

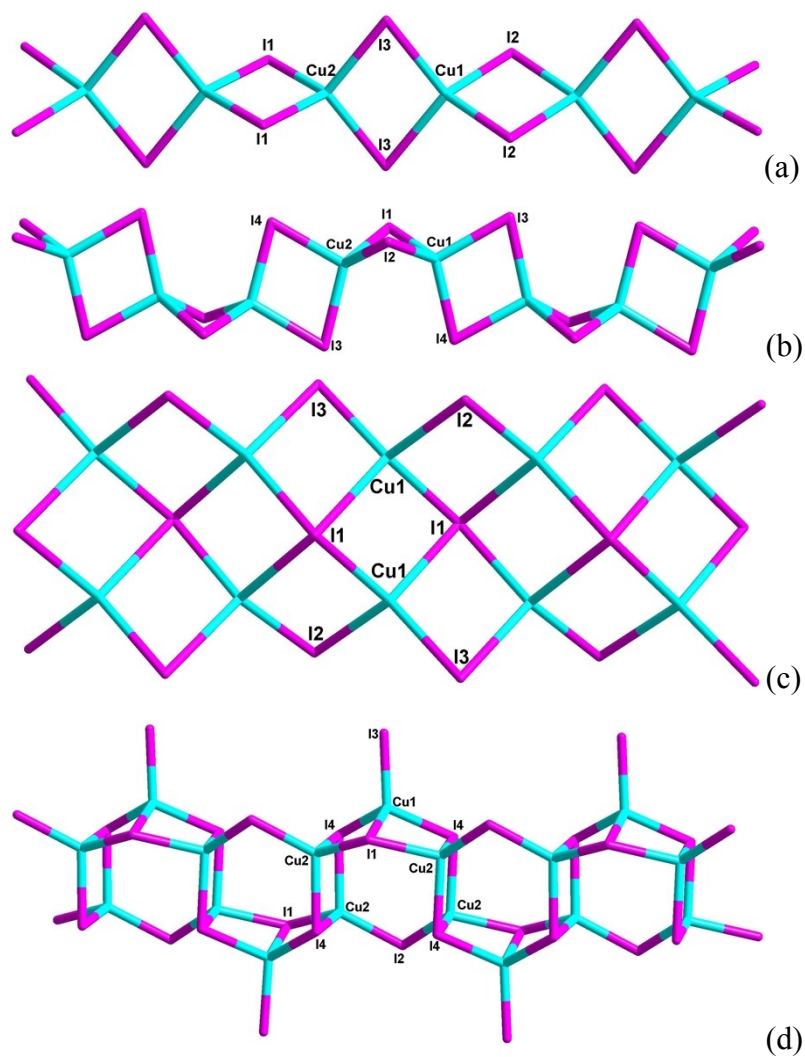

**Fig. S1.** Detailed view of the 1D  $[\text{CuI}_2]^-$  chain in compound **1** (a), 1D  $[\text{Cu}_2\text{I}_4]^{2-}$  chain in compound **2** (b), 1D  $[\text{Cu}_2\text{I}_3]^-$  chain in compound **3** (c) and 1D  $[\text{Cu}_3\text{I}_5]^{2-}$  chain in compound **4** (d).

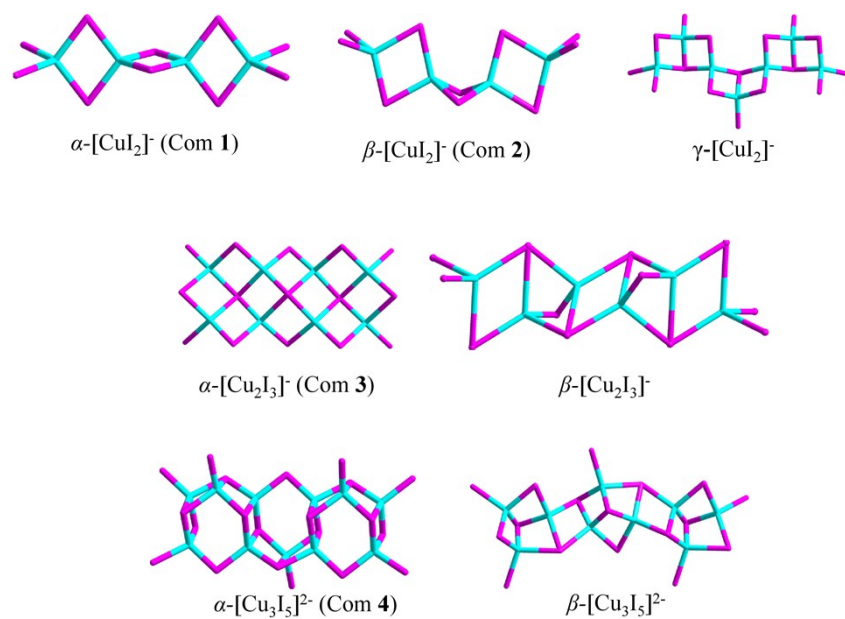

**Fig. S2.** Variation of the partial structural motifs of 1D [CuI<sub>2</sub>]<sup>-</sup>, [Cu<sub>2</sub>I<sub>3</sub>]<sup>-</sup> and [Cu<sub>3</sub>I<sub>5</sub>]<sup>2-</sup> chains based on [CuI<sub>4</sub>] tetrahedrons.

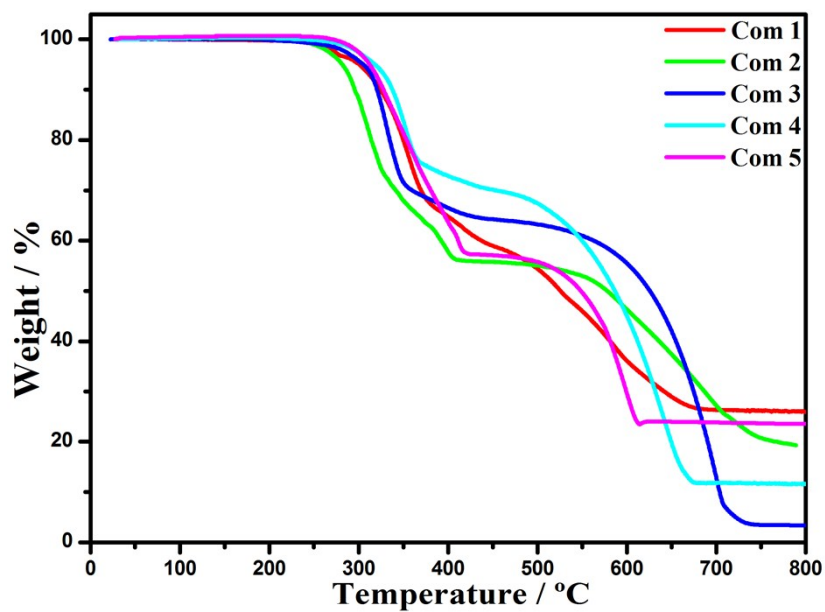

**Fig. S3.** The thermogravimetric analysis curves for compounds 1–5 under nitrogen atmosphere.

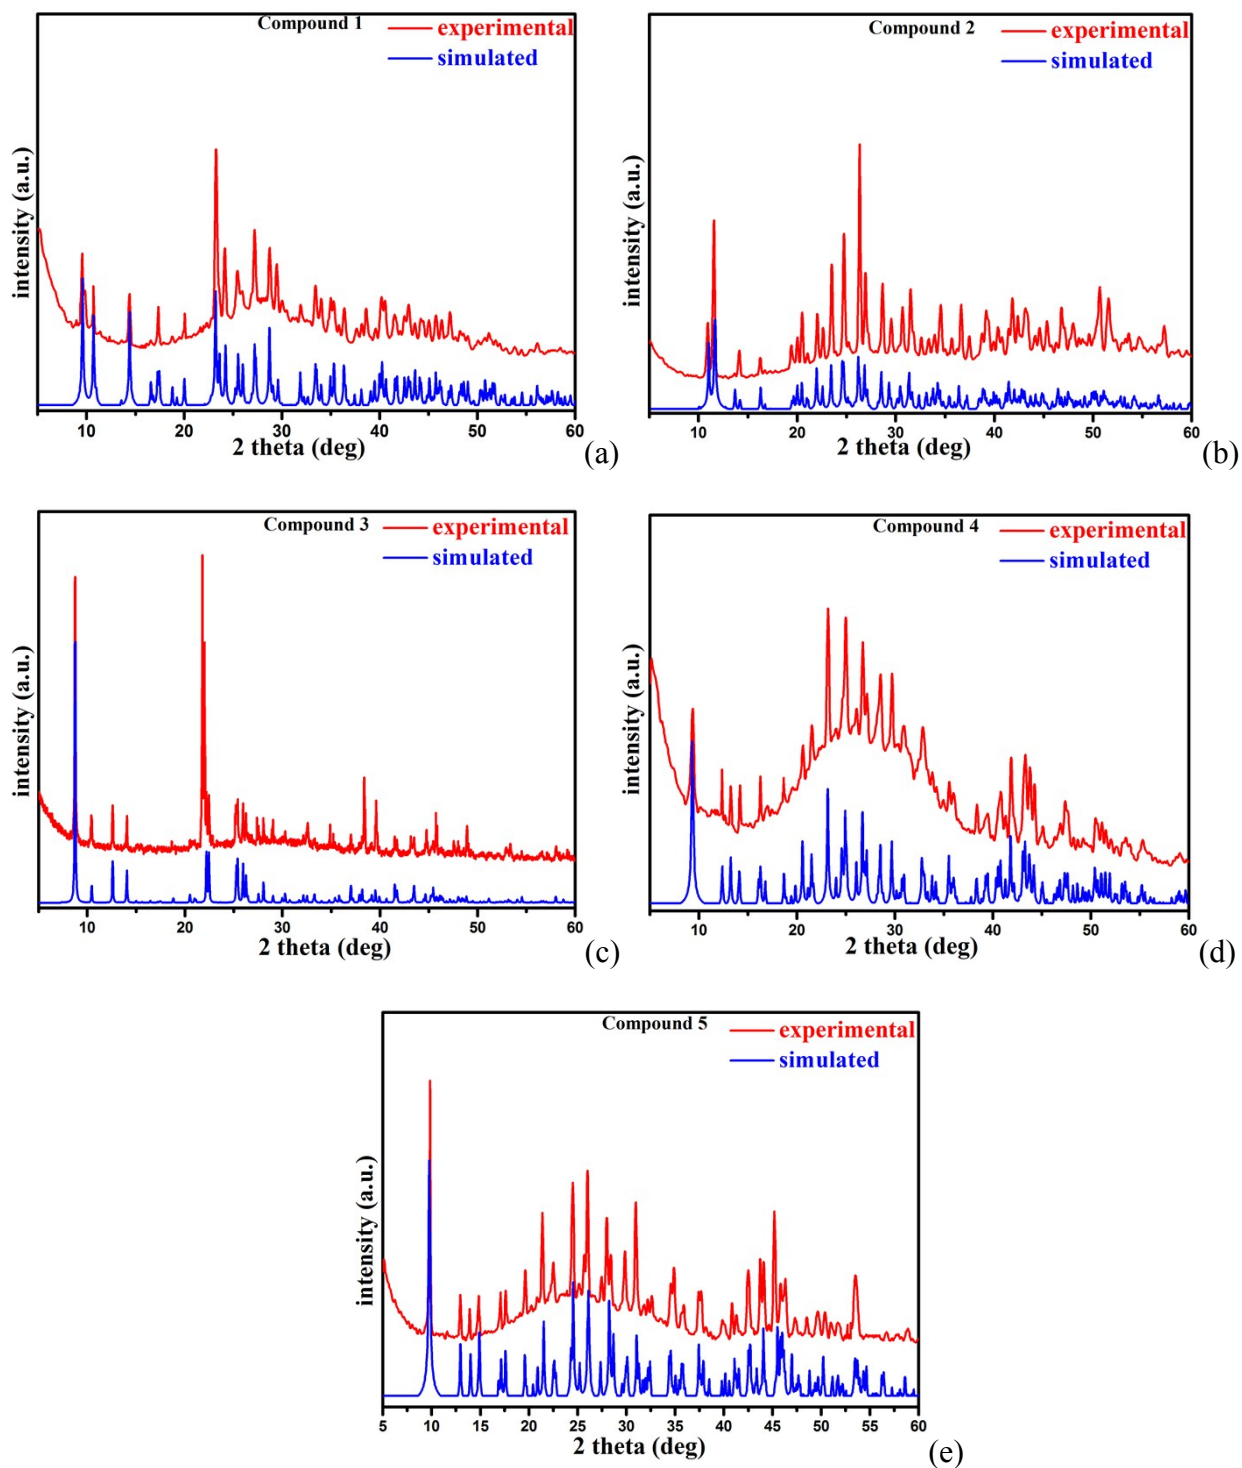

**Fig. S4.** Experimental and simulated XRD patterns of compounds 1-5.

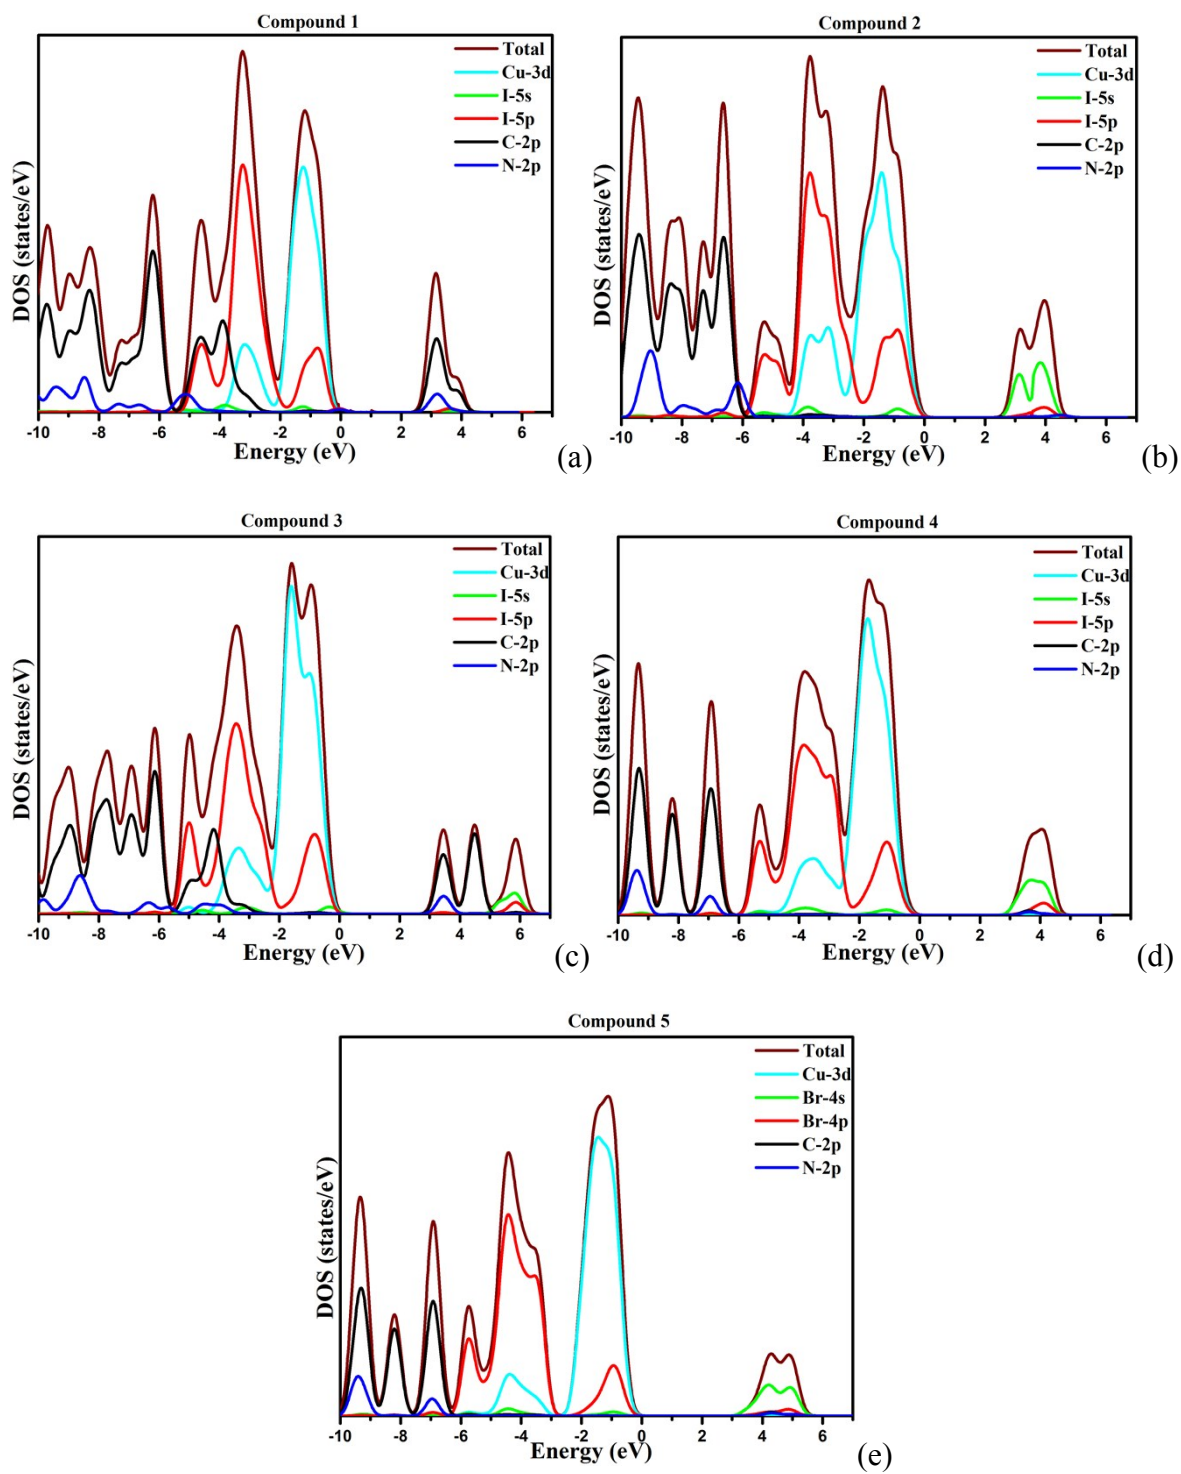

**Fig. S5.** The calculated total and partial density of states for compounds 1-5.

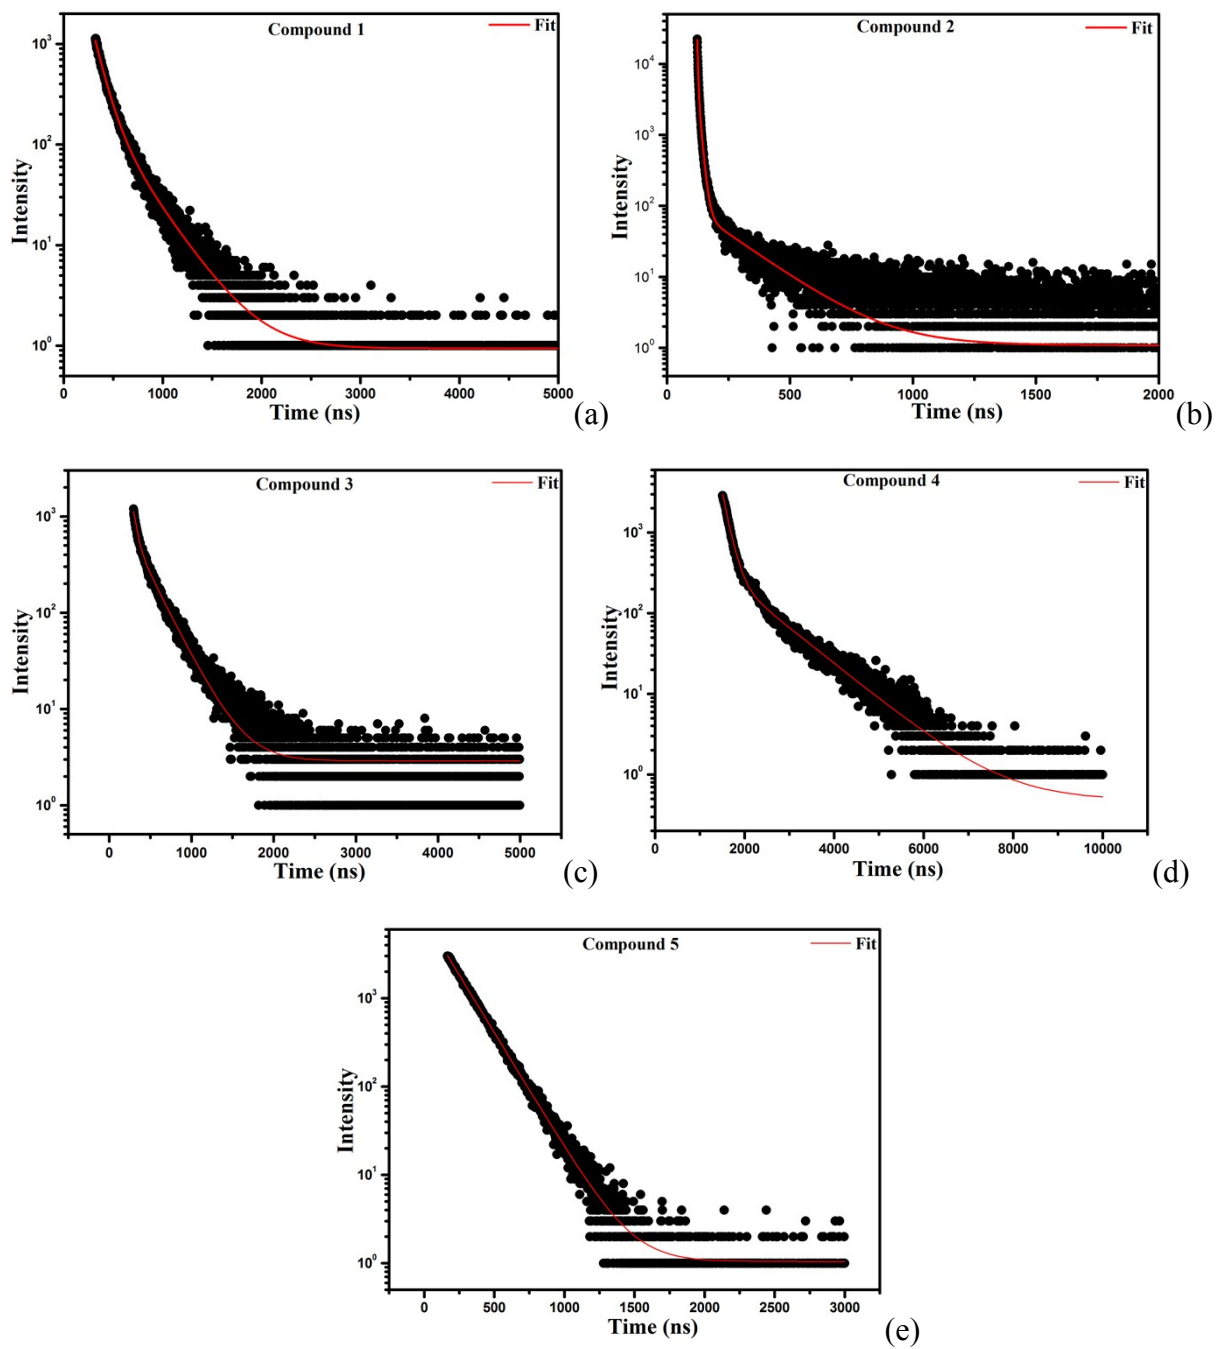

Fig. S6. The time-resolved PL emissions of compounds 1-5.

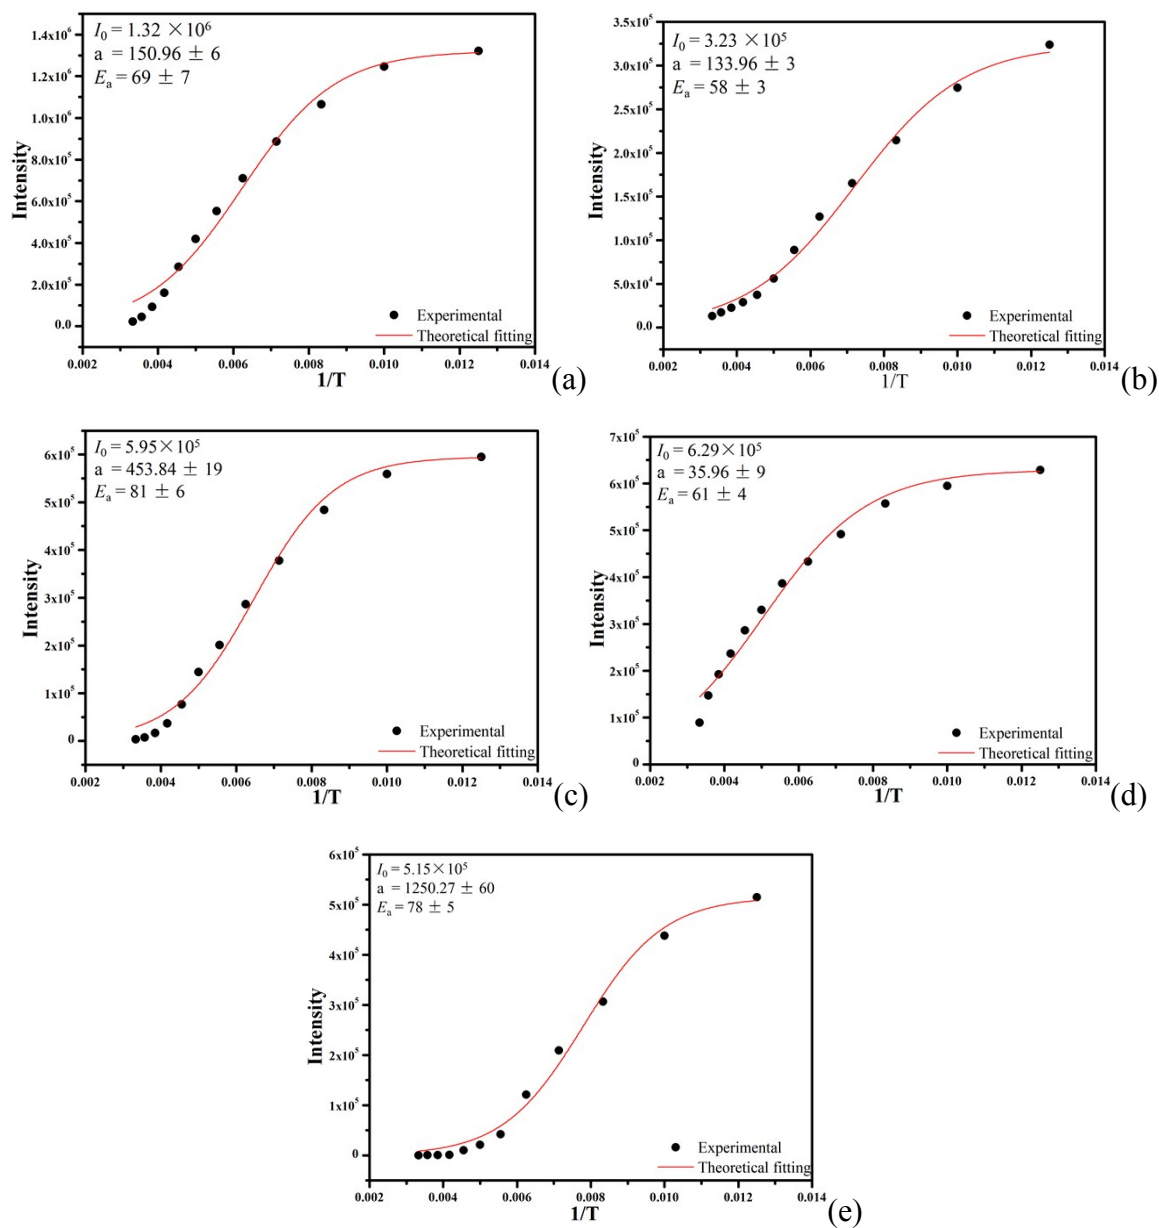

**Fig. S7.** Temperature dependence of the PL intensity and theoretical fitting data from Arrhenius-type model for compounds 1 (a), 2 (b), 3 (c), 4 (d) and 5 (e).

**Table S1.** Crystal Data and Structure Refinements for compounds **1-5**.

| Compound                                                                                             | <b>1</b>                                        | <b>2</b>                                                                     | <b>3</b>                                                       | <b>4</b>                                                                     | <b>5</b>                                                                      |
|------------------------------------------------------------------------------------------------------|-------------------------------------------------|------------------------------------------------------------------------------|----------------------------------------------------------------|------------------------------------------------------------------------------|-------------------------------------------------------------------------------|
| chemical                                                                                             | C <sub>6</sub> NH <sub>8</sub> CuI <sub>2</sub> | C <sub>8</sub> N <sub>2</sub> H <sub>18</sub> Cu <sub>2</sub> I <sub>4</sub> | C <sub>7</sub> NH <sub>10</sub> Cu <sub>2</sub> I <sub>3</sub> | C <sub>6</sub> N <sub>2</sub> H <sub>14</sub> Cu <sub>3</sub> I <sub>5</sub> | C <sub>6</sub> N <sub>2</sub> H <sub>14</sub> Cu <sub>3</sub> Br <sub>5</sub> |
| fw                                                                                                   | 411.47                                          | 776.92                                                                       | 615.94                                                         | 939.31                                                                       | 704.36                                                                        |
| Space group                                                                                          | <i>Cmca</i>                                     | <i>P2<sub>1</sub>/c</i>                                                      | <i>Pnma</i>                                                    | <i>Pnma</i>                                                                  | <i>Pnma</i>                                                                   |
| <i>a</i> /Å                                                                                          | 13.102(10)                                      | 9.2225(9)                                                                    | 16.9103(11)                                                    | 18.748(3)                                                                    | 17.951(2)                                                                     |
| <i>b</i> /Å                                                                                          | 18.403(14)                                      | 10.9983(11)                                                                  | 6.3543(4)                                                      | 8.3956(12)                                                                   | 7.9123(10)                                                                    |
| <i>c</i> /Å                                                                                          | 16.480(13)                                      | 15.5063(16)                                                                  | 12.5868(8)                                                     | 11.0005(16)                                                                  | 10.4907(14)                                                                   |
| $\beta$ /°                                                                                           | 90                                              | 93.8620(10)                                                                  | 90                                                             | 90                                                                           | 90                                                                            |
| <i>V</i> (Å <sup>3</sup> )                                                                           | 3974(5)                                         | 1569.3(3)                                                                    | 1352.49(15)                                                    | 1731.5(4)                                                                    | 1490.0(3)                                                                     |
| <i>Z</i>                                                                                             | 16                                              | 4                                                                            | 4                                                              | 4                                                                            | 4                                                                             |
| <i>D</i> <sub>calcd</sub> (g·cm <sup>-3</sup> )                                                      | 2.751                                           | 3.289                                                                        | 3.025                                                          | 3.603                                                                        | 3.140                                                                         |
| Temp (K)                                                                                             | 298(2)                                          | 298(2)                                                                       | 298(2)                                                         | 298(2)                                                                       | 298(2)                                                                        |
| $\mu$ (mm <sup>-1</sup> )                                                                            | 8.348                                           | 10.558                                                                       | 9.954                                                          | 12.545                                                                       | 17.626                                                                        |
| <i>F</i> (000)                                                                                       | 2976                                            | 1400                                                                         | 1104                                                           | 1664                                                                         | 1304                                                                          |
| Reflections                                                                                          | 16376                                           | 17756                                                                        | 15117                                                          | 19071                                                                        | 16396                                                                         |
| Unique                                                                                               | 2383                                            | 3595                                                                         | 1701                                                           | 2155                                                                         | 1828                                                                          |
| Reflections                                                                                          | 2223                                            | 2825                                                                         | 1519                                                           | 2042                                                                         | 1538                                                                          |
| GOF on <i>F</i> <sup>2</sup>                                                                         | 1.067                                           | 1.058                                                                        | 1.067                                                          | 1.018                                                                        | 1.033                                                                         |
| <i>R</i> <sub>1</sub> , <i>wR</i> <sub>2</sub><br>( <i>I</i> > 2 $\sigma$ ( <i>I</i> )) <sup>a</sup> | 0.0333/0.0958                                   | 0.0648/0.2193                                                                | 0.0217/0.0495                                                  | 0.0208/0.0495                                                                | 0.0443/0.1105                                                                 |
| <i>R</i> <sub>1</sub> , <i>wR</i> <sub>2</sub> (all)                                                 | 0.0382/0.0998                                   | 0.0806/0.2323                                                                | 0.0258/0.0513                                                  | 0.0226/0.0504                                                                | 0.0537/0.1176                                                                 |
| $\Delta\rho$ <sub>max</sub> (e/Å <sup>3</sup> )                                                      | 0.693                                           | 4.148                                                                        | 1.161                                                          | 1.164                                                                        | 1.719                                                                         |
| $\Delta\rho$ <sub>min</sub> (e/Å <sup>3</sup> )                                                      | -0.847                                          | -3.495                                                                       | -0.618                                                         | -0.777                                                                       | -1.721                                                                        |

<sup>a</sup>  $R_1 = \sum ||F_o| - |F_c|| / \sum |F_o|$ ,  $wR_2 = \{\sum w[(F_o)^2 - (F_c)^2]^2 / \sum w[(F_o)^2]^2\}^{1/2}$



**Table S2.** Selected bond lengths (Å) and angle (°) for compound 1.

|                     |            |                     |            |
|---------------------|------------|---------------------|------------|
| Cu(1)-I(3)          | 2.6750(15) | Cu(2)-I(1)          | 2.6583(15) |
| Cu(1)-I(3)#1        | 2.6751(15) | Cu(2)-I(1)#3        | 2.6583(15) |
| Cu(1)-I(2)          | 2.7015(15) | Cu(2)-I(3)          | 2.6740(15) |
| Cu(1)-I(2)#2        | 2.7015(15) | Cu(2)-I(3)#1        | 2.6740(15) |
| I(3)-Cu(1)-I(3)#1   | 106.68(7)  | I(1)-Cu(2)-I(1)#3   | 104.78(7)  |
| I(3)-Cu(1)-I(2)     | 118.58(5)  | I(1)-Cu(2)-I(3)     | 111.34(5)  |
| I(3)#1-Cu(1)-I(2)   | 106.80(5)  | I(1)#3-Cu(2)-I(3)   | 111.37(4)  |
| I(3)-Cu(1)-I(2)#2   | 106.80(5)  | I(1)-Cu(2)-I(3)#1   | 111.37(4)  |
| I(3)#1-Cu(1)-I(2)#2 | 118.58(5)  | I(1)#3-Cu(2)-I(3)#1 | 111.34(5)  |
| I(2)-Cu(1)-I(2)#2   | 100.02(6)  | I(3)-Cu(2)-I(3)#1   | 106.74(7)  |

Symmetry transformations used to generate equivalent atoms: #1  $x, -y-1, -z+1$ , #2  $-x-1, -y-1, -z+1$ , #3  $-x, -y-1, z+1$ .

**Table S3.** Selected bond lengths (Å) and angle (°) for compound 2.

|                     |           |                 |           |
|---------------------|-----------|-----------------|-----------|
| Cu(1)-I(2)          | 2.573(2)  | Cu(2)-I(1)      | 2.642(2)  |
| Cu(1)-I(3)#1        | 2.557(2)  | Cu(2)-I(2)      | 2.579(2)  |
| Cu(1)-I(4)#1        | 2.495(2)  | Cu(2)-I(3)      | 2.556(2)  |
| Cu(1)-I(1)          | 2.619(2)  | Cu(2)-I(4)      | 2.501(2)  |
| Cu(2)-Cu(1)         | 2.737(2)  | Cu(2)-Cu(1)#1   | 3.015(2)  |
| I(4)#2-Cu(1)-I(3)#2 | 106.81(7) | I(4)-Cu(2)-I(3) | 106.64(8) |
| I(4)#2-Cu(1)-I(2)   | 111.51(8) | I(4)-Cu(2)-I(2) | 106.31(8) |
| I(3)#2-Cu(1)-I(2)   | 108.66(8) | I(3)-Cu(2)-I(2) | 116.51(8) |
| I(4)#2-Cu(1)-I(1)   | 115.50(8) | I(4)-Cu(2)-I(1) | 105.27(8) |
| I(3)#2-Cu(1)-I(1)   | 109.24(7) | I(3)-Cu(2)-I(1) | 117.01(8) |
| I(2)-Cu(1)-I(1)     | 104.98(7) | I(2)-Cu(2)-I(1) | 104.13(7) |

Symmetry transformations used to generate equivalent atoms: #1  $-x+3/2, y-1/2, -z+1/2$ , #2  $-x+3/2, y+1/2, -z+1/2$ .

**Table S4.** Selected bond lengths (Å) and angle (°) for compound **3**.

|                   |           |                   |             |
|-------------------|-----------|-------------------|-------------|
| Cu(1)-I(3)        | 2.6084(6) | Cu(1)-I(1)#1      | 2.7142(6)   |
| Cu(1)-I(2)        | 2.6272(6) | Cu(1)-I(1)        | 2.7305(6)   |
| I(3)-Cu(1)-I(2)   | 114.02(2) | I(3)-Cu(1)-I(1)   | 111.03(2)   |
| I(3)-Cu(1)-I(1)#1 | 109.36(2) | I(2)-Cu(1)-I(1)   | 104.41(2)   |
| I(2)-Cu(1)-I(1)#1 | 108.23(2) | I(1)#1-Cu(1)-I(1) | 109.626(19) |

Symmetry transformations used to generate equivalent atoms: #1 -x, -y, -z+1.

**Table S5.** Selected bond lengths (Å) and angle (°) for compound **4**.

|                   |           |                   |           |
|-------------------|-----------|-------------------|-----------|
| Cu(1)-I(3)        | 2.6210(9) | Cu(2)-I(2)        | 2.6186(7) |
| Cu(1)-I(4)        | 2.6915(6) | Cu(2)-I(1)        | 2.6481(6) |
| Cu(1)-I(4)#1      | 2.6916(6) | Cu(2)-I(4)        | 2.6488(7) |
| Cu(1)-I(1)        | 2.7161(9) | Cu(2)-I(4)#2      | 2.7067(7) |
| Cu(1)-Cu(2)#1     | 2.8049(8) | Cu(1)-Cu(2)       | 2.8049(8) |
| I(3)-Cu(1)-I(4)   | 108.04(2) | I(2)-Cu(2)-I(1)   | 107.73(2) |
| I(3)-Cu(1)-I(4)#1 | 108.04(2) | I(2)-Cu(2)-I(4)   | 112.45(2) |
| I(4)-Cu(1)-I(4)#1 | 100.31(3) | I(1)-Cu(2)-I(4)   | 118.09(2) |
| I(3)-Cu(1)-I(1)   | 111.17(3) | I(2)-Cu(2)-I(4)#2 | 116.42(2) |
| I(4)-Cu(1)-I(1)   | 114.28(2) | I(1)-Cu(2)-I(4)#2 | 100.84(2) |
| I(4)#1-Cu(1)-I(1) | 114.28(2) | I(4)-Cu(2)-I(4)#2 | 101.03(2) |

Symmetry transformations used to generate equivalent atoms: #1 x, -y-1/2, z, #2 -x+1, -y, -z+1.

**Table S6.** Selected bond lengths (Å) and angle (°) for compound **5**.

|                     |            |                     |            |
|---------------------|------------|---------------------|------------|
| Cu(1)-Br(2)         | 2.4112(14) | Cu(2)-Br(1)         | 2.4360(10) |
| Cu(1)-Br(3)         | 2.5841(15) | Cu(2)-Br(3)         | 2.5102(11) |
| Cu(1)-Br(4)         | 2.5264(10) | Cu(2)-Br(4)         | 2.4993(10) |
| Cu(1)-Br(4)#2       | 2.5264(10) | Cu(2)-Br(4)#3       | 2.5259(11) |
| Cu(1)-Cu(2)         | 2.7994(13) | Cu(1)-Cu(2)#2       | 2.7995(13) |
| Br(2)-Cu(1)-Br(4)#2 | 111.77(4)  | Br(1)-Cu(2)-Br(4)   | 114.17(4)  |
| Br(2)-Cu(1)-Br(4)   | 111.78(4)  | Br(1)-Cu(2)-Br(3)   | 107.85(4)  |
| Br(4)#2-Cu(1)-Br(4) | 100.02(5)  | Br(4)-Cu(2)-Br(3)   | 113.56(4)  |
| Br(2)-Cu(1)-Br(3)   | 112.28(5)  | Br(1)-Cu(2)-Br(4)#3 | 117.07(4)  |
| Br(4)#2-Cu(1)-Br(3) | 110.18(4)  | Br(4)-Cu(2)-Br(4)#3 | 103.59(4)  |
| Br(4)-Cu(1)-Br(3)   | 110.18(4)  | Br(3)-Cu(2)-Br(4)#3 | 99.89(4)   |

Symmetry transformations used to generate equivalent atoms: #1  $x, -y+1/2, z$ , #2  $x, -y-1/2, z$ , #3  $-x+1, -y, -z+2$ .
